# Supplementary material for: Rotational diffusion and alignment of short gold nanorods in an external electric field
Source: Royal Society of Chemistry journal article supplement (doi:10.1039/c2cp24092k), 2012-01-01
Supplement: c2cp24092k.pdf [file c2cp24092k.pdf]

## Supplemental information for

### Rotational diffusion and alignment of short gold nanorods in an external electric field

Peter Zijlstra, Marijn van Stee, Nico Verhart, Ziyu Gu, and Michel Orrit

MoNOS, Huygens Laboratorium, Universiteit Leiden, 2300 RA Leiden, The Netherlands

## 1 UV-VIS spectra

Gold nanorods were synthesized using seed-mediated wet-chemical synthesis in the presence of silver [1]. By varying the concentration of silver ions and seeds in the growth solution, we obtained three different samples with different volumes but similar aspect ratios. All samples exhibited a longitudinal SPR around 650 nm, close to the wavelength of our probe laser (671 nm). The UV-VIS extinction spectra (measured with a Shimadzu UV1701 spectrometer) of the three samples employed in this study are shown in Fig. S1. The curves are normalized to a path-length of 400  $\mu\text{m}$  to reflect the OD in the sample cell.

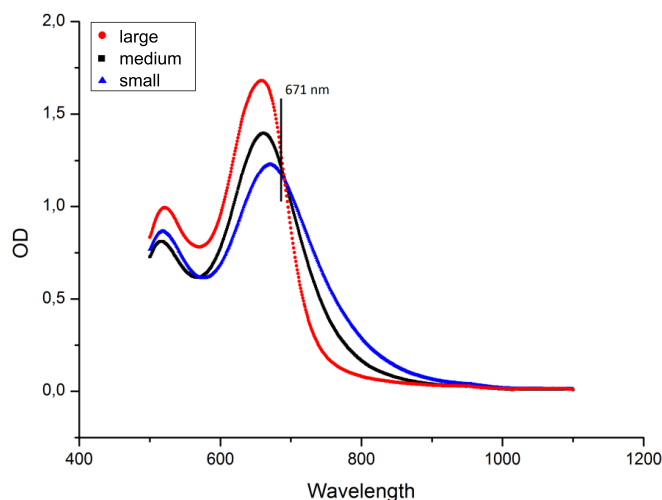

**Figure S1** Extinction profiles of the three samples employed in this study. The curves are normalized to a pathlength of 400  $\mu\text{m}$  to reflect the OD in the sample cell. The probe laser wavelength employed for the polarized extinction measurements is indicated at 671 nm.

## 2 Zeta-potential

The surface charge (zeta-potential) of the CTAB-stabilized particles was measured using a Malvern zeta-sizer. The zeta-potential is determined by applying an electric field  $E$  across the dispersion of nanoparticles [2]. Charged particles migrate towards the electrode of opposite charge (electrophoresis), with a velocity that is proportional to the zeta-potential. A laser Doppler anemometer determines the velocity of the particles by measuring the frequency- or phase-shift of a laser beam. This velocity  $v$  is related to the electrophoretic mobility  $\mu_e$  through  $\mu_e = v/E$ . We measure  $\mu_e = 3.45 \times 10^{-8} \text{ m}^2\text{V}^{-1}\text{s}^{-1}$ , which can be related to the zeta-potential  $\zeta$  through the Smoluchowski equation  $\mu_e = \epsilon_r \epsilon_0 \zeta / \eta$ , where  $\epsilon_r$  is the static dielectric constant of the medium (water),  $\epsilon_0$  is the permittivity of free space, and  $\eta$  is the dynamic viscosity of the medium [2]. Note that this simple relation is only valid for a thin double layer, i.e. for particle radii much greater than the Debye length. This yields a mean zeta-potential of  $\sim 44 \text{ mV}$  at neutral pH, as expected for CTAB stabilized particles. The complete zeta-potential distribution of a typical sample in CTAB solution ( $[\text{CTAB}] \approx 2 \text{ mM}$ ) is shown in Fig. S2.

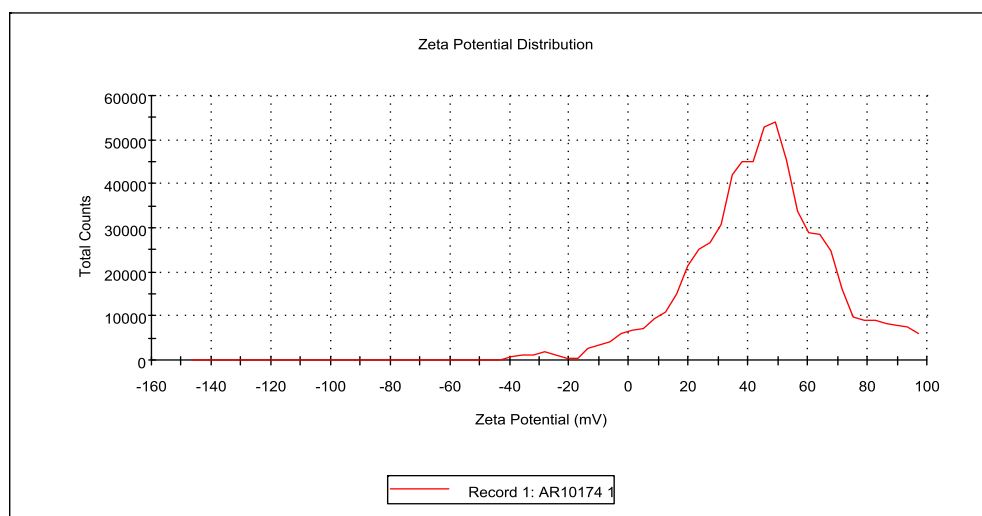

**Figure S2** Zeta-potential distribution of an aqueous solution of gold nanorods stabilized by CTAB at neutral pH.

### 3 Blank: CTAB only

To verify that the observed  $\Delta OD/OD$  is caused by the presence of the nanorods in the cell we measured the polarized extinction of a sample containing an aqueous solution of 1 mM CTAB. The results are shown in Fig. S3, and are plotted on the same scale as Fig. 2 in the main text. Because we cannot define  $\Delta OD/OD$  due to the transparency of the CTAB solution, we have plotted the normalized lock-in voltage instead. In the full range of field-strengths we observe a constant lock-in voltage equal to the noise level of the measurement. This confirms that the lock-in signal observed in our measurements is caused by the orientation of gold nanorods in the external field.

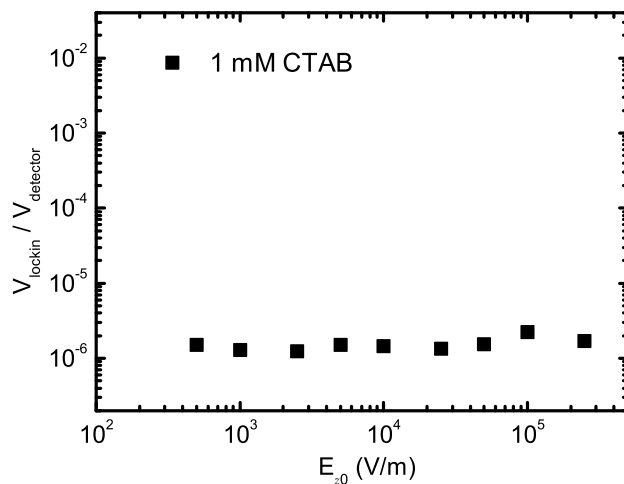

**Figure S3** Lock-in voltage as a function of electric field strength for a sample containing an aqueous solution of 1 mM CTAB. The experimental parameters are identical to the ones used for the measurements of the nanorods (i.e.  $400 \mu\text{m}$  spacing between electrodes,  $\Omega/2\pi=2.1$  kHz.)

## 4 Theory

We discuss the frequency dependence of the amplitude and phase of the optical density (OD) of a solution of gold nanorods in a weak amplitude-modulated alternating-current electric field. The optical density is probed by a laser beam traveling in the  $\hat{z}$  direction with linear polarization along the  $\hat{x}$  direction. The applied electric field is given by

$$\vec{E}(t) = E_z(t) \hat{z} = \frac{1}{2} E_{z0} (1 + \cos(\Omega t + \Phi)) \cos(\omega t + \phi) \hat{z}, \quad (\text{S1})$$

where  $\omega$  is the carrier frequency and  $\Omega$  the modulation frequency. Because the period of the carrier wave is much shorter than the rotational diffusion time ( $\omega \gg D_{\text{rot}}$ ) the nanorods will not be able to follow the field and we can average over the high frequency components such that the squared electric field becomes

$$\vec{E}^2(t) = \frac{1}{4} E_{z0}^2 \left\{ \frac{3}{4} + \cos(\Omega t + \Phi) + \frac{1}{4} \cos[2(\Omega t + \Phi)] \right\} \hat{z} \quad (\text{S2})$$

The polarizability tensor of a gold nanorod can be written as  $\bar{\alpha}_0 = \alpha_{\parallel,0} \hat{1}\hat{1}^T + \alpha_{\perp,0} (\hat{2}\hat{2}^T + \hat{3}\hat{3}^T)$ , where

$$\begin{aligned} \hat{1} &= \sin(\theta) \cos(\varphi) \hat{x} + \sin(\theta) \sin(\varphi) \hat{y} + \cos(\theta) \hat{z}, \\ \hat{2} &= \cos(\theta) \cos(\varphi) \hat{x} + \cos(\theta) \sin(\varphi) \hat{y} - \sin(\theta) \hat{z}, \text{ and} \\ \hat{3} &= -\sin(\varphi) \hat{x} + \cos(\varphi) \hat{y}, \end{aligned} \quad (\text{S3})$$

where  $\theta$  is the angle between the symmetry axis of the nanorod and the  $z$ -axis,  $\phi$  is the angle between the  $x$ -axis and the projection of the symmetry axis onto the  $xy$ -plane,<sup>1</sup>  $\alpha_{\parallel,0}$  is the longitudinal polarizability along the symmetry axis  $\hat{1}$  of the nanorod and  $\alpha_{\perp,0}$  is the transverse polarizability along the axes perpendicular to the symmetry axis of the nanorod ( $\hat{2}$  and  $\hat{3}$ ). The subscript zero is used to indicate the low frequency limit of the polarizability. The torque exerted on a nanorod by the electric field is given by [3]

$$\vec{\mathcal{T}}((\theta, \varphi), t) = (\bar{\alpha}_0 \vec{E}(t)) \times \vec{E}(t) = -\Delta\alpha_0 \cos(\theta) \sin(\theta) E_z^2(t) \hat{3}, \quad (\text{S4})$$

where  $\Delta\alpha_0 = \alpha_{\parallel,0} - \alpha_{\perp,0}$  is the difference between the longitudinal- and transverse polarizability.

The time-evolution of the probability distribution  $p((\theta, \phi), t)$  for the orientation of the nanorods is given by the Fokker-Planck (FP) or Smoluchowski equation and can be expressed as

$$\frac{\partial p((\theta, \phi), t)}{\partial t} = D_{\text{rot}} \left\{ \nabla_{\text{SP}}^2 p((\theta, \phi), t) + \frac{1}{k_{\text{BT}}} \nabla_{\text{S}} \cdot \left( p((\theta, \phi), t) \left( \hat{1} \times \vec{\mathcal{T}}((\theta, \phi), t) \right) \right) \right\}, \quad (\text{S5})$$

where  $\nabla_{\text{S}}$  denotes the gradient operator restricted to the surface of a unit sphere and  $D_{\text{rot}}$  denotes the rotational diffusion coefficient for rotations perpendicular to the symmetry axis. The FP equation can be written in terms of a Smoluchowski operator  $\hat{\mathcal{S}}$ :  $\partial p / \partial t = \hat{\mathcal{S}} p$ . Assuming the electric field to be weak ( $\Delta\alpha_0 E_{z0}^2 / (k_{\text{BT}}) \ll 1$ ) we can consider the electric field as perturbation to the

<sup>1</sup>A third Euler angle  $\psi$  describing rotations about the  $\hat{1}$  axis is ignored.

freely diffusing nanorods, and the Smoluchowski operator can be written as  $\hat{\mathcal{S}} = \hat{\mathcal{S}}_0 + \hat{\mathcal{S}}'$ . The zeroth order Smoluchowski operator is  $\hat{\mathcal{S}}_0 = D_{\text{rot}} \nabla_{\mathbf{S}}^2$ . The eigenfunctions of the zero-field Smoluchowski equation are the spherical harmonics  $Y_\ell^{m_\ell}(\theta, \phi)$  with eigenvalues  $-\kappa_\ell = -D_{\text{rot}} \ell(\ell+1)$  [4, 5, 6]. As  $t \rightarrow \infty$  the probability distribution approaches the steady-state solution:

$$p((\theta, \phi), t) \rightarrow \frac{1}{\sqrt{4\pi}} Y_0^0(\theta, \phi) = \frac{1}{4\pi} \quad \text{as} \quad t \rightarrow \infty. \quad (\text{S6})$$

Following Eq. S5 the perturbation to the Smoluchowski operator is given by

$$\hat{\mathcal{S}}' \dots = D_{\text{rot}} (\nabla_{\mathbf{S}} \dots) \cdot (\hat{\mathbf{1}} \times \vec{\mathcal{T}}) + D_{\text{rot}} \dots \nabla_{\mathbf{S}} \cdot (\hat{\mathbf{1}} \times \vec{\mathcal{T}}). \quad (\text{S7})$$

To first order in time-dependent perturbation theory we can neglect the first term in equation S7 because  $\nabla_{\mathbf{S}} Y_0^0 = 0$ . The second term becomes

$$\hat{\mathcal{S}}' = \Delta\alpha_0 E_z^2(t) D_{\text{rot}} 4\sqrt{\frac{\pi}{5}} Y_2^0(\theta, \varphi) \quad (\text{S8})$$

which gives rise to a term proportional to  $Y_2^0(\theta, \varphi)$  in the probability distribution. Assuming the perturbing electric field has been on for a long time and the steady-state has been reached, the solution to the FP equation is given by:

$$p((\theta, \varphi), t) = \frac{1}{\sqrt{4\pi}} Y_0^0(\theta, \varphi) + \frac{1}{24\sqrt{5\pi}} \frac{\Delta\alpha_0 E_{z0}^2}{k_B T} \left( \frac{3}{4} + \frac{\cos(\Omega t + \Phi - \Delta\Phi_\Omega)}{\sqrt{1 + (\Omega/(6D_{\text{rot}}))^2}} \right. \\ \left. + \frac{1}{4} \frac{\cos(2\Omega t + 2\Phi - \Delta\Phi_{2\Omega})}{\sqrt{1 + (\Omega/(3D_{\text{rot}}))^2}} \right) Y_2^0(\theta, \varphi). \quad (\text{S9})$$

The phase differences  $\Delta\Phi_\Omega$  and  $\Delta\Phi_{2\Omega}$  are given by:

$$\tan \Delta\Phi_\Omega = \frac{\Omega}{6D_{\text{rot}}}, \quad \text{and} \quad (\text{S10})$$

$$\tan \Delta\Phi_{2\Omega} = \frac{\Omega}{3D_{\text{rot}}}. \quad (\text{S11})$$

We calculate the orientation-dependent extinction cross section  $\sigma_{\text{ext}}(\theta, \phi)$  for a particle in the Rayleigh regime in terms of its polarizability  $\bar{\alpha}$  [7]. We use this together with equation S9 to obtain the time dependent ensemble average of the extinction cross section, probed along  $\hat{x}$ :

$$\langle \sigma_{\text{ext}} \rangle (t) = \frac{1}{3} \left( \frac{k \Im \{ \alpha_{\parallel} \}}{\epsilon_m \epsilon_0} + \frac{k^4 |\alpha_{\parallel}|^2}{6\pi (\epsilon_m \epsilon_0)^2} \right) + \frac{2}{3} \left( \frac{k \Im \{ \alpha_{\perp} \}}{\epsilon_m \epsilon_0} + \frac{k^4 |\alpha_{\perp}|^2}{6\pi (\epsilon_m \epsilon_0)^2} \right) \\ - \frac{1}{180} \frac{\Delta\alpha_0 E_{z0}^2}{k_B T} \left( \frac{3}{4} + \frac{\cos(\Omega t + \Phi - \Delta\Phi_\Omega)}{\sqrt{1 + (\Omega/(6D_{\text{rot}}))^2}} + \frac{1}{4} \frac{\cos(2\Omega t + 2\Phi - \Delta\Phi_{2\Omega})}{\sqrt{1 + (\Omega/(3D_{\text{rot}}))^2}} \right) \\ \times \left( \frac{k}{\epsilon_m \epsilon_0} \Im \{ \alpha_{\parallel} - \alpha_{\perp} \} + \frac{k^4}{6\pi (\epsilon_m \epsilon_0)^2} (|\alpha_{\parallel}|^2 - |\alpha_{\perp}|^2) \right), \quad (\text{S12})$$

where  $\alpha_{\parallel}$  and  $\alpha_{\perp}$  are the longitudinal- and transverse polarizabilities at the frequency of the laser,  $\varepsilon_0$  is the permittivity of the vacuum,  $\varepsilon_m$  is the relative permittivity of the medium surrounding the particle and  $k$  is the wavenumber in the medium surrounding the nanorods. The first line of Eq. S12 represents the extinction cross section for the zero-field case, whereas the second and third line provide the changes in the presence of the electric field (with contributions at  $\Omega$  and  $2\Omega$ ).

Because  $\alpha_{\perp} \ll \alpha_{\parallel}$  at the wavelength of our probe laser ( $\lambda_{\text{laser}} = 671$  nm), the magnitude of the component of Eq. S12 at frequency  $\Omega$  can be simplified to

$$\frac{\Delta\text{OD}}{\text{OD}} = -\frac{1}{60} \frac{1}{\sqrt{1 + (\Omega / (6D_{\text{rot}}))^2}} \frac{\Delta\alpha_0 E_{z0}^2}{k_B T}, \quad (\text{S13})$$

where we have used the fact that the OD is proportional to  $\langle\sigma_{\text{ext}}\rangle$ . The phase difference between the applied field and the induced alignment is then given by Eq. S10.

## References

- [1] B. Nikoobakht, M. A. El-Sayed, Preparation and growth mechanism of gold nanorods (NRs) using seed-mediated growth method. *Chem. Mater.* **15**, 1957 (2003).
- [2] W. B. Russell, D. A. Saville, W. R. Schowalter, *Colloidal dispersions*. (Cambridge University Press, 1999).
- [3] W. A. Shelton, K. D. Bonin, T. G. Walker, Nonlinear motion of optically torqued nanorods. *Phys. Rev. E* **71**, 036204 (2005).
- [4] D. J. Griffiths, *Introduction to quantum mechanics*. (Prentice Hall, Inc., Upper Saddle River, 1995).
- [5] A. Mertelj, J. L. Arauz-Lara, G. Maret, T. Gisler, H. Stark, Rotational diffusion in a bistable potential. *Europhys. Lett.* **59**, 337 (2002).
- [6] K. Schulten, I. Kosztin, *Lectures in theoretical biophysics*. (<http://www.ks.uiuc.edu/Services/Class/NSM.pdf>, accessed 19 December 2011).
- [7] C. F. Bohren, D. R. Huffman, *Absorption and Scattering of Light by Small Particles*. (John Wiley & Sons. Inc., New York, 1998).
